# Supplementary material
Source: Research Square preprint supplement (doi:10.21203/rs.3.rs-9059335/v1)
Supplement: Supplementary file 1 [file 4e75ffc0bfe6d2a2e1b5359a.docx]

Supplement Figure


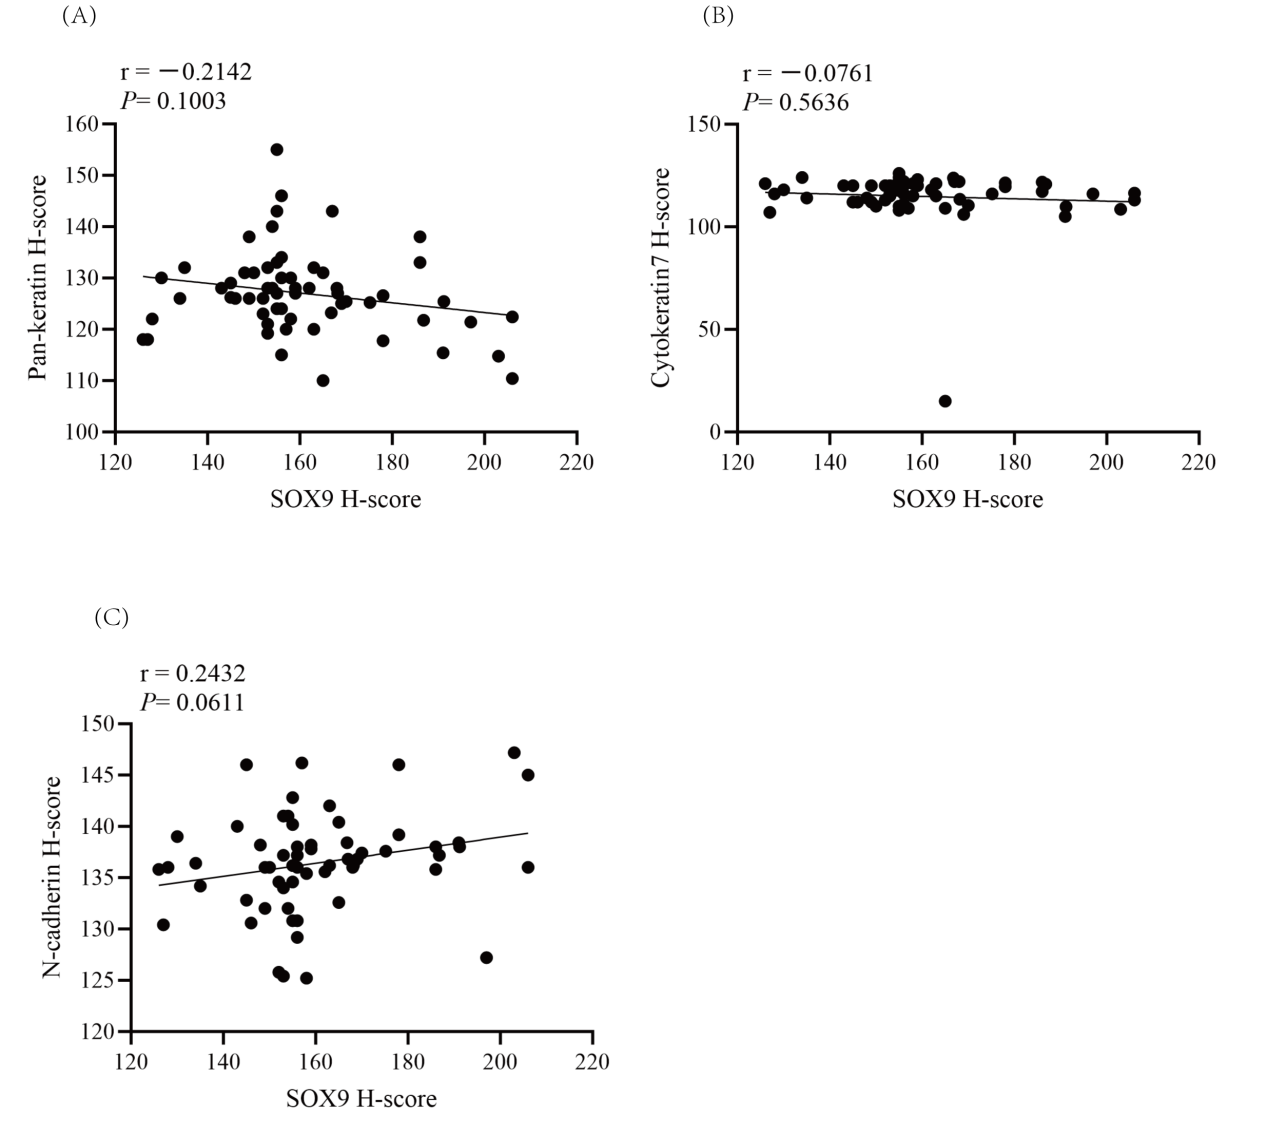
Figure 1. SOX9 shows no significant correlation with Pan-keratin, Cytokeratin 7, and N-cadherin.
